# Supplementary material
Source: PubMed Central journal article supplement (PMC7168125)
Supplement: PSC-23-311-s001.pdf [file PSC-23-311-s001.pdf]

| Peptide | Sequence gH                |
|---------|----------------------------|
| H1      | QTDPWFLDGLGMDRMYWRDTNTGRL  |
| H2      | FLDGLGMDRMYWRDTNTGRLWLPNT  |
| H3      | GMDRMYWRDTNTGRLWLPNTPDPQK  |
| H4      | YWRDTNTGRLWLPNTPDPQKPPRGF  |
| H5      | NTGRLWLPNTPDPQKPPRGFLAPPD  |
| H6      | WLPNTPDPQKPPRGFLAPPDELNLT  |
| H7      | PDPQKPPRGFLAPPDELNLTTASLP  |
| H8      | PPRGFLAPPDELNLTTASLPLLRWY  |
| H9      | LAPPDELNLTTASLPLLRWYEERFC  |
| H10     | ELNLTTASLPLLRWYEERFCFVLVT  |
| H11     | TASLPLLRWYEERFCFVLVTTAEFP  |
| H12     | LLRWYEERFCFVLVTTAEFPRDPGQ  |
| H13     | EERFCFVLVTTAEFPRDPGQLLYIP  |
| H14     | FVLVTTAEFPRDPGQLLYIPKTYLL  |
| H15     | TAEFPRDPGQLLYIPKTYLLGRPPN  |
| H16     | RDPGQLLYIPKTYLLGRPPNASLPA  |
| H17     | LLYIPKTYLLGRPPNASLPAPTTVE  |
| H18     | KTYLLGRPPNASLPAPTTVEPTAQP  |
| H19     | GRPPNASLPAPTTVEPTAQPPPAVA  |
| H20     | ASLPAPTTVEPTAQPPPAVAPLKGL  |
| H21     | PTTVEPTAQPPPAVAPLKGLLHNPT  |
| H22     | PTAQPPPAVAPLKGLLHNPTASVLL  |
| H23     | PPAVAPLKGLLHNPTASVLLRSRAW  |
| H24     | PLKGLLHNPTASVLLRSRAWVTFSA  |
| H25     | LHNPTASVLLRSRAWVTFSAVPDPE  |
| H26     | ASVLLRSRAWVTFSAVPDPEALTFP  |
| H27     | RSRAWVTFSAVPDPEALTFPRGDNV  |
| H28     | VTFSAVPDPEALTFPRGDNVATASH  |
| H29     | VPDPEALTFPRGDNVATASHPSGPR  |
| H30     | ALTFPRGDNVATASHPSGPRDTPPP  |
| H31     | RGDNVATASHPSGPRDTPPPRPPVG  |
| H32     | ATASHPSGPRDTPPPRPPVGARRHP  |
| H33     | PSGPRDTPPPRPPVGARRHPTTELD  |
| H34     | DTPPPRPPVGARRHPTTELDITHLH  |
| H35     | RPPVGARRHPTTELDITHLHNASTT  |
| H36     | ARRHPTTELDITHLHNASTTWLATR  |
| H37     | TTELDITHLHNASTTWLATRGLLRS  |
| H38     | ITHLHNASTTWLATRGLLRSPPGRYV |
| H39     | NASTTWLATRGLLRSPPGRYVYFSPS |
| H40     | WLATRGLLRSPPGRYVYFSPSASTWP |
| H41     | GLLRSPPGRYVYFSPSASTWPVGIWT |
| H42     | PGRYVYFSPSASTWPVGIWTTGELV  |
| H43     | YFSPSASTWPVGIWTTGELVLGCDA  |
| H44     | ASTWPVGIWTTGELVLGCDAALVRA  |
| H45     | VGIWTTGELVLGCDAALVRARYGRE  |

|     |                            |
|-----|----------------------------|
| H46 | TGELVLGCDAALVRARYGREFMGLV  |
| H47 | LGCDAAALVRARYGREFMGLVISMHD |
| H48 | ALVRARYGREFMGLVISMHDSPPAE  |
| H49 | RYGREFMGLVISMHDSPPAEVMVVP  |
| H50 | FMGLVISMHDSPPAEVMVVPAGQTL  |
| H51 | ISMHDSPPAEVMVVPAGQTLDRVGD  |
| H52 | SPPAEVMVVPAGQTLDRVGDPADEN  |
| H53 | VMVVPAGQTLDRVGDPADENPPGAL  |
| H54 | AGQTLDRVGDPADENPPGALPGPPG  |
| H55 | DRVGDPADENPPGALPGPPGGPRYR  |
| H56 | PADENPPGALPGPPGGPRYRVFVLG  |
| H57 | PPGALPGPPGGPRYRVFVLGSLTRA  |
| H58 | PGPPGGPRYRVFVLGSLTRADNGSA  |
| H59 | GPRYRVFVLGSLTRADNGSALDALR  |
| H60 | VFVLGSLTRADNGSALDALRRVGGY  |
| H61 | SLTRADNGSALDALRRVGGYPEEGT  |
| H62 | DNGSALDALRRVGGYPEEGTNYAQF  |
| H63 | LDALRRVGGYPEEGTNYAQFLSRAY  |
| H64 | RVGGYPEEGTNYAQFLSRAYAEFFS  |
| H65 | PEEGTNYAQFLSRAYAEFFSGDAGA  |
| H66 | NYAQFLSRAYAEFFSGDAGAEQGPR  |
| H67 | LSRAYAEFFSGDAGAEQGPRPPLFW  |
| H68 | AEFFSGDAGAEQGPRPPLFWRLTGL  |
| H69 | GDAGAEQGPRPPLFWRLTGLLATSG  |
| H70 | EQGPRPPLFWRLTGLLATSGFAFVN  |
| H71 | PPLFWRLTGLLATSGFAFVNAAHAN  |
| H72 | RLTGLLATSGFAFVNAAHANGAVCL  |
| H73 | LATSGFAFVNAAHANGAVCLSDLLG  |
| H74 | FAFVNAAHANGAVCLSDLLGFLAHS  |
| H75 | AAHANGAVCLSDLLGFLAHSRALAG  |
| H76 | GAVCLSDLLGFLAHSRALAGLAARG  |
| H77 | SDLLGFLAHSRALAGLAARGAAGCA  |
| H78 | FLAHSRALAGLAARGAAGCAADSVF  |
| H79 | RALAGLAARGAAGCAADSVFFNVS   |
| H80 | LAARGAAGCAADSVFFNVSVDPTA   |
| H81 | AAGCAADSVFFNVSVDPTARLQLE   |
| H82 | ADSVFFNVSVDPTARLQLEARLQH   |
| H83 | FNVSVDPTARLQLEARLQHLVAEI   |
| H84 | LDPTARLQLEARLQHLVAEILEREQ  |
| H85 | RLQLEARLQHLVAEILEREQSLALH  |
| H86 | ARLQHLVAEILEREQSLALHALGYQ  |
| H87 | LVAEILEREQSLALHALGYQLAFVL  |
| H88 | LEREQSLALHALGYQLAFVLDSPSA  |
| H89 | SLALHALGYQLAFVLDSPSAYDAVA  |
| H90 | ALGYQLAFVLDSPSAYDAVAPSAAH  |
| H91 | LAFVLDSPSAYDAVAPSAAHLIDAL  |

|      |                           |
|------|---------------------------|
| H92  | DSPSAYDAVAPSAAHLIDALYAEFL |
| H93  | YDAVAPSAAHLIDALYAEFLGGRVL |
| H94  | PSAAHLIDALYAEFLGGRVLTTPVV |
| H95  | LIDALYAEFLGGRVLTTPVVHRALF |
| H96  | YAEFLGGRVLTTPVVHRALFYASAV |
| H97  | GGRVLTTPVVHRALFYASAVLRQPF |
| H98  | TTPVVHRALFYASAVLRQPFLAGVP |
| H99  | HRALFYASAVLRQPFLAGVPSAVQR |
| H100 | YASAVLRQPFLAGVPSAVQRERARR |
| H101 | LRQPFLAGVPSAVQRERARRSLLIA |
| H102 | LAGVPSAVQRERARRSLLIASALCT |
| H103 | SAVQRERARRSLLIASALCTSDVAA |
| H104 | ERARRSLLIASALCTSDVAAATNAD |
| H105 | SLLIASALCTSDVAAATNADLRTAL |
| H106 | SALCTSDVAAATNADLRTALARADH |
| H107 | SDVAAATNADLRTALARADHQKTLF |
| H108 | ATNADLRTALARADHQKTLFWLPDH |
| H109 | LRTALARADHQKTLFWLPDHFSPCA |
| H110 | ARADHQKTLFWLPDHFSPCAASLRF |
| H111 | QKTLFWLPDHFSPCAASLRFDLDES |
| H112 | WLPDHFSPCAASLRFDLDESFILED |
| H113 | FSPCAASLRFDLDESFILEDALAQA |
| H114 | ASLRFDLDESFILEDALAQATRSET |
| H115 | DLDESFILEDALAQATRSETPVEVL |
| H116 | VFILDALAQATRSETPVEVLAQQTH |
| H117 | ALAQATRSETPVEVLAQQTHGLAST |
| H118 | TRSETPVEVLAQQTHGLASTLTRWA |
| H119 | PVEVLAQQTHGLASTLTRWAHYNAL |
| H120 | AQQTHGLASTLTRWAHYNALIRAFV |
| H121 | GLASTLTRWAHYNALIRAFVPEASH |
| H122 | LTRWAHYNALIRAFVPEASHRCGGQ |
| H123 | HYNALIRAFVPEASHRCGGQSANVE |
| H124 | IRAFVPEASHRCGGQSANVEPRILV |
| H125 | PEASHRCGGQSANVEPRILVPITHN |
| H126 | RCGGQSANVEPRILVPITHNASYVV |
| H127 | SANVEPRILVPITHNASYVVTHSPL |
| H128 | PRILVPITHNASYVVTHSPLPRGIG |
| H129 | PITHNASYVVTHSPLPRGIGYKLTG |
| H130 | ASYVVTHSPLPRGIGYKLTGVDVRR |
| H131 | THSPLPRGIGYKLTGVDVRRPLFLT |
| H132 | PRGIGYKLTGVDVRRPLFLTYLTAT |
| H133 | YKLTGVDVRRPLFLTYLTATCEGST |
| H134 | VDVRRPLFLTYLTATCEGSTRDIES |
| H135 | PLFLTYLTATCEGSTRDIESKRLVR |
| H136 | YLTATCEGSTRDIESKRLVRTQNQR |
| H137 | CEGSTRDIESKRLVRTQNQRDLGLV |

|      |                           |
|------|---------------------------|
| H138 | RDIESKRLVRTQNQRDLGLVGAVFM |
| H139 | KRLVRTQNQRDLGLVGAVFMRYTPA |
| H140 | TQNQRDLGLVGAVFMRYTPAGEVMS |
| H141 | DLGLVGAVFMRYTPAGEVMSVLLVD |
| H142 | GAVFMRYTPAGEVMSVLLVDTDNTQ |
| H143 | RYTPAGEVMSVLLVDTDNTQQQIAA |
| H144 | GEVMSVLLVDTDNTQQQIAAGPTEG |
| H145 | VLLVDTDNTQQQIAAGPTEGAPSVF |
| H146 | TDNTQQQIAAGPTEGAPSVFSSDVP |
| H147 | QQIAAGPTEGAPSVFSSDVPSTALL |
| H148 | GPTEGAPSVFSSDVPSTALLLPNG  |
