# Supplementary material
Source: PubMed Central journal article supplement (PMC7168125)
Supplement: PSC-23-311-s002.pdf [file PSC-23-311-s002.pdf]

| <b>Peptide</b> | <b>Sequenze gL</b> |
|----------------|--------------------|
| L1             | GLPSTEYVIRSRVAR    |
| L2             | EYVIRSRVAREVGDI    |
| L3             | SRVAREVGDILKVPC    |
| L4             | EVGDILKVPCVPLPS    |
| L5             | LKVPCVPLPSDDLWD    |
| L6             | VPLPSDDLWRYETP     |
| L7             | DDLWRYETPSAINY     |
| L8             | RYETPSAINYALIDG    |
| L9             | SAINYALIDGIFLRY    |
| L10            | ALIDGIFLRYHCPGL    |
| L11            | IFLRYHCPGLDTVLW    |
| L12            | HCPGLDTVLWDRHAQ    |
| L13            | DTVLWDRHAQKAYWV    |
| L14            | DRHAQKAYWVNPFLF    |
| L15            | KAYWVNPFLFVAGFL    |
| L16            | NPFLFVAGFLEDLSY    |
| L17            | VAGFLEDLSYPAFPA    |
| L18            | EDLSYPAFPANTQET    |
| L19            | PAFPANTQETETRLA    |
| L20            | NTQETETRLALYKEI    |
| L21            | ETRLALYKEIRQALD    |
| L22            | LYKEIRQALDSRKQA    |
| L23            | RQALDSRKQAASHTP    |
| L24            | SRKQAASHTPVKAGC    |
| L25            | ASHTPVKAGCVNFDY    |
| L26            | VKAGCVNFDYSRTRR    |
| L27            | VNFDYSRTRRCVGRQ    |
| L28            | SRTRRCVGRQDLGPT    |
| L29            | CVGRQDLGPTNGTSG    |
| L30            | DLGPTNGTSGRTPVL    |
| L31            | NGTSGRTPVLPPDDE    |
| L32            | RTPVLPPDDEAGLQP    |
| L33            | PPDDEAGLQPKPLTT    |
| L34            | AGLQPKPLTTPPII     |
| L35            | KPLTTPPIIATSDP     |
| L36            | PPPIIATSDPTPRRD    |
| L37            | ATSDPTPRRDAATKS    |
| L38            | TPRRDAATKSRRRRP    |
| L39            | AATKSRRRRPHSRRL    |
